# Supplementary material for: Achieving universal health coverage in small island states: could importing health services provide a solution?
Source: PubMed Central journal article supplement — BMJ Glob Health. 2018 Feb 19;3(1):e000612. doi: 10.1136/bmjgh-2017-000612 (PMC5841501; doi:10.1136/bmjgh-2017-000612), 2018-02-19
Supplement: bmjgh-2017-000612supp001.pdf [file bmjgh-2017-000612supp001.pdf]

**Annex 1:** Methodologies used by SIDS to report travel data to IMF, Source: International Monetary Fund (2016) through the Enhanced General Data Dissemination System.

| Country       | Original source of data                     | Methodology                                                                                                                                                                                                                                                                         |
|---------------|---------------------------------------------|-------------------------------------------------------------------------------------------------------------------------------------------------------------------------------------------------------------------------------------------------------------------------------------|
| Bahamas       | The Central Bank of The Bahamas             | Income: derived from exit surveys of foreign visitors conducted by the Ministry of Tourism.<br>Expenditures: compiled using exchange control records. The entire country is covered.                                                                                                |
| Barbados      | The Central Bank of Barbados                | Income: obtained via survey/foreign exchange data.<br>Expenditure: BOP survey supplemented by foreign exchange control.                                                                                                                                                             |
| Belize        | Central Bank of Belize                      | Annual BOP survey is conducted.                                                                                                                                                                                                                                                     |
| Cape Verde    | Bank of Cape Verde                          | Data are obtained through the financial system supplemented by surveys of enterprises and by information from the postal services and the General Directorate of Customs.                                                                                                           |
| Comoros       | Central Bank of Comoros                     | Public sector figures are provided by the Treasury, while private sector figures are estimated at 2 percent of foreign currency sold by the banking system (transfers made through the BCC are added to this figure)                                                                |
| Fiji          | Bureau of Statistics                        | Income: data are obtained from a quarterly Fiji Islands Bureau of Statistics survey of the major tourist hotels supplemented by the annual survey of departing tourists conducted by the Ministry of Tourism.<br>Debit data are obtained from the OET.                              |
| Guinea-Bissau | Central Bank of West African States (BCEAO) | Main data sources are the airlines and the Directorate General of the Hotel Industry and Tourism.<br>For services provided or received by government, not included elsewhere, are enterprises, Guinea-Bissau embassies abroad, and accredited diplomatic missions in Guinea-Bissau. |
| Maldives      | Maldives Monetary Authority                 | Income is estimated from the Tourism goods and Services Tax(TGST) data, sourced from the Maldives Inland Revenue Authority(MIRA)<br>Expenditure is estimated from the data, sourced from the immigration on the departing Maldivian nationals.                                      |

|                       |                                                         |                                                                                                                                                                                                                                                                                                                                                                                                                                                                                                                                              |
|-----------------------|---------------------------------------------------------|----------------------------------------------------------------------------------------------------------------------------------------------------------------------------------------------------------------------------------------------------------------------------------------------------------------------------------------------------------------------------------------------------------------------------------------------------------------------------------------------------------------------------------------------|
| Marshall Islands      | Economic Policy, Planning and Statistics Office (EPPSO) | <p>The balance of payments data are compiled from the following sources.</p> <p>Exports and imports – from RMI Customs Department.</p> <p>Freight and insurance – estimated at 10 percent of imports, c.i.f.</p> <p>Passenger services – from airline records</p> <p>Rent from Kwajalein land – from the Ministry of Finance</p> <p>Budget grants– from the Ministry of Finance</p> <p>Capital grants– from the Ministry of Finance</p> <p>Foreign direct investment – from the Corporate Registry at the Office of the Attorney General</p> |
| Sao Tome and Principe | Central Bank                                            | <p>Source: combination of information from the General Customs Directorate (foreign trade statistics), financial institutions (daily records of exchange operations), External Debt Unit of the Central Bank of S. Tome e Principe (debt payment and service), Budget Directorate, and the Directorate of Economic Planning of the Ministry of Planning and Finance (transactions related to the program of public investments), surveys of export/import companies and non-governmental and private organizations.</p>                      |
| Tonga                 | National Statistical Office                             | <p>Main data sources are Customs-based merchandise trade statistics, limited surveys of the major ship, airline and insurance companies and data from the exchange records maintained by the Reserve Bank of Tonga.</p>                                                                                                                                                                                                                                                                                                                      |
| Tuvalu                | Central Statistics Division                             | <p>Source: a combination of national accounts data, Customs merchandise trade, immigration and vital statistics.</p> <p>The balance of payments data cover all transactions of Tuvalu's resident sector and the nonresidents.</p>                                                                                                                                                                                                                                                                                                            |
| Vanuatu               | Reserve Bank of Vanuatu                                 | <p>Source: combination of data from the statistics office on international trade, enterprise surveys, port/shipping/airlines authorities, banks' overseas exchange transactions, embassy returns, banks' balance sheets, Government Finance, RBV, and other administrative sources.</p>                                                                                                                                                                                                                                                      |
